# Supplementary material for: Assessment of genetic structure and trait associations of Watkins wheat landraces under Egyptian field conditions
Source: Frontiers journal article supplement (doi:10.3389/fgene.2024.1384220), 2024-12-02
Supplement: Table_1.XLSX [file Table_1.XLSX]

## Sheet: Sheet1
Supplementary Table 6. Marker-trait associations discovered in this study.
Chromosome	SNPs-ID	Position	Allele 1	Allele 0	Allele-Frequency	Standard-Error	P-value	Log P-value	FDR	Trait	Location	Year
AX-95628762	5B	487609306	G	A	319	0.576384	0.000665751	3.17669	0.366422	1000KW	Sids	2021
AX-95240640	6A	448659818	T	C	474	0.569563	0.000534342	3.27218	0.366422	1000KW	Sids	2021
AX-95222073	7D	627407437	T	G	466	2.05645	0.000646721	3.18928	0.366422	1000KW	Sids	2021
AX-95213437	7A	16644487	T	C	0.48	1.20826	0.000682774	3.16572	0.366422	1000KW	Sids	2021
AX-95192394	2B	223730264	A	G	328	0.589396	0.000876131	3.05743	0.440804	1000KW	Sids	2021
AX-95172496	2A	11897161	T	C	116	1.23125	0.000294874	3.53036	0.366422	1000KW	Sids	2021
AX-95121720	6B	570978171	C	T	153	0.755041	0.000227517	3.64299	0.366422	1000KW	Sids	2021
AX-94876870	6A	573479743	T	C	314	0.628459	0.00054824	3.26103	0.366422	1000KW	Sids	2021
AX-94820378	2A	4216068	C	T	308	0.814048	0.000344917	3.46229	0.366422	1000KW	Sids	2021
AX-94722807	2D	11197879	T	C	229	0.625798	0.000321177	3.49326	0.366422	1000KW	Sids	2021
AX-94632774	7B	518460267	T	C	295	0.605408	0.000422745	3.37392	0.366422	1000KW	Sids	2021
AX-94566850	6B	569035882	G	C	141	0.762633	0.000336631	3.47285	0.366422	1000KW	Sids	2021
AX-94559061	5B	17968928	C	G	111	0.814907	0.000464272	3.33323	0.366422	1000KW	Sids	2021
AX-94543148	2A	2327023	T	C	0.1	1.20389	0.00051063	3.29189	0.366422	1000KW	Sids	2021
AX-94488580	2B	245888693	A	G	139	0.763874	0.000141516	3.84919	0.366422	1000KW	Sids	2021
AX-94409253	6B	576206017	G	A	149	0.734999	7e-05	4.15481	0.366422	1000KW	Sids	2021
AX-95629459	5A	527917830	A	G	307	0.748032	0.000299727	3.52327	0.400686	1000KW	Sakha	2021
AX-95253351	5B	527609084	C	T	262	0.786763	0.000801603	3.09604	0.559761	1000KW	Sakha	2021
AX-95162623	6A	611851405	T	C	453	0.590169	1.96e-05	4.70804	0.155448	1000KW	Sakha	2021
AX-95160000	5B	295655758	G	A	484	3.08694	0.000566553	3.24676	0.559761	1000KW	Sakha	2021
AX-95153187	3D	567148810	A	G	456	1.56727	0.000837443	3.07704	0.559761	1000KW	Sakha	2021
AX-95105252	4A	534811936	T	C	123	0.959948	0.00064318	3.19167	0.559761	1000KW	Sakha	2021
AX-95008150	3B	20720502	A	G	453	0.878318	0.000249551	3.60284	0.400686	1000KW	Sakha	2021
AX-94779755	4A	449890286	A	G	96	1.07099	3.88e-05	4.41161	0.155448	1000KW	Sakha	2021
AX-94651425	5A	527918040	G	A	307	0.748032	0.000299727	3.52327	0.400686	1000KW	Sakha	2021
AX-94462177	5A	527917669	A	G	304	0.74191	0.000286887	3.54229	0.400686	1000KW	Sakha	2021
AX-94392668	4A	230998766	C	T	133	0.9881	0.000537051	3.26998	0.559761	1000KW	Sakha	2021
AX-94388553	4A	534550072	A	C	434	1.86968	0.000779282	3.10831	0.460235	1000KW	Sakha	2021
AX-95631167	4A	21635879	A	G	225	0.651062	0.000445929	3.35073	0.515685	1000KW	Nubaria	2021
AX-95152254	2A	539013195	G	A	125	0.985021	0.000370392	3.43134	0.499721	1000KW	Nubaria	2021
AX-95133915	7B	706815377	G	C	313	0.558598	0.00022753	3.64296	0.368371	1000KW	Nubaria	2021
AX-94915784	7B	706857002	C	A	0.43	1.19765	2.76e-05	4.55851	0.0745739	1000KW	Nubaria	2021
AX-94601315	1A	560197340	C	T	98	0.914652	2.48e-05	4.60549	0.0745739	1000KW	Nubaria	2021
AX-94536001	7A	736526544	C	G	137	0.797479	0.000753668	3.12282	0.610094	1000KW	Nubaria	2021
AX-94424659	3B	123463494	T	C	258	0.693225	0.000524434	3.28031	0.530661	1000KW	Nubaria	2021
AX-94409249	3B	126000624	G	A	274	0.689838	0.000717641	3.14409	0.610094	1000KW	Nubaria	2021
AX-94400142	4A	581754951	G	A	104	0.886829	4.78e-06	5.32078	0.0386756	1000KW	Nubaria	2021
AX-94382988	4A	21063780	G	T	246	0.641481	8.52e-05	4.0697	0.172369	1000KW	Nubaria	2021
AX-94927881	5A	511881002	T	G	445	0.794849	7.54e-05	4.12281	0.50914	1000KW	Gemmiza	2021
AX-94804508	2B	729767615	A	G	434	0.79856	0.000125822	3.90024	0.50914	1000KW	Gemmiza	2021
AX-94619709	3B	76437979	T	C	283	0.883243	0.000672569	3.17226	0.907184	1000KW	Gemmiza	2021
AX-94588608	5A	0	A	G	425	2.24209	0.000570108	3.24404	0.907184	1000KW	Gemmiza	2021
AX-94556555	2B	728397526	C	G	362	0.92018	0.000834559	3.07854	0.964869	1000KW	Gemmiza	2021
AX-94527764	6D	10700855	G	A	492	3.73374	0.000530661	3.27518	0.907184	1000KW	Gemmiza	2021
AX-94487149	6D	454587813	T	C	0.17	1.70438	0.000571971	3.24263	0.907184	1000KW	Gemmiza	2021
AX-94633626	3B	630299246	C	T	228	0.730755	0.000890024	3.0506	0.726971	DH	Sids	2021
AX-94409249	3B	126000624	G	A	284	0.753934	8.96e-05	4.04783	0.365814	DH	Sids	2021
AX-94424659	3B	123463494	T	C	268	0.757531	0.000443912	3.3527	0.659079	DH	Sids	2021
AX-94425015	4B	2036631	G	C	188	0.754784	8.42e-05	4.07485	0.365814	DH	Sids	2021
AX-94446101	5B	435158960	T	C	361	0.847633	0.000401778	3.39601	0.904117	DH	Sids	2020
AX-94467745	2B	51889596	T	C	0.22	1.20262	0.000700568	3.15455	0.659079	DH	Sids	2021
AX-94632604	4B	2036668	C	A	186	0.76812	0.000570918	3.24343	0.659079	DH	Sids	2021
AX-94656741	4A	86293053	G	A	0.25	1.0911	0.000944013	3.02502	0.904117	DH	Sids	2020
AX-94715786	5A	580460603	T	C	325	0.647213	0.000726213	3.13894	0.659079	DH	Sids	2021
AX-94803542	2B	51084705	C	T	441	0.618181	0.000350519	3.45529	0.659079	DH	Sids	2021
AX-94858447	4A	715817936	T	C	428	0.57329	0.000160861	3.79355	0.437971	DH	Sids	2021
AX-94947812	1B	508544250	A	G	0.09	1.6189	0.000612695	3.21276	0.904117	DH	Sids	2020
AX-95183268	4A	576923140	T	C	491	0.841022	0.00093479	3.02929	0.904117	DH	Sids	2020
AX-95228652	7A	26428735	T	C	227	1.1271	0.000616705	3.20992	0.659079	DH	Sids	2021
AX-95231601	5B	435158668	C	T	348	0.859303	0.000526145	3.27889	0.904117	DH	Sids	2020
AX-95254812	7B	741895280	G	A	432	1.071	0.000958942	3.01821	0.904117	DH	Sids	2020
AX-94860881	6A	615889762	G	A	242	1.56403	0.000717249	3.14433	0.545629	DH	Sakha	2021
AX-94747010	3B	630366799	T	C	219	0.990247	0.000846545	3.07235	0.545629	DH	Sakha	2021
AX-94741030	4A	634841985	G	C	275	0.816838	0.000933192	3.03003	0.545629	DH	Sakha	2021
AX-94388553	4A	534550072	A	C	431	2.62246	0.000464487	3.33303	0.460235	DH	Sakha	2021
AX-94392668	4A	230998766	C	T	0.14	1.35008	3.28e-06	5.48353	0.0266305	DH	Sakha	2021
AX-94423466	6A	615462722	A	G	293	1.46811	2.15e-05	4.66693	0.0581917	DH	Sakha	2021
AX-94423669	4B	670410179	T	C	212	1.11486	0.000810326	3.09134	0.710806	DH	Sakha	2020
AX-94478215	4A	164397895	C	T	143	1.18752	0.000141735	3.84852	0.928364	DH	Sakha	2021
AX-94509919	6B	707382479	A	G	0.38	0.900647	0.000849326	3.07093	0.710806	DH	Sakha	2020
AX-94531661	7A	657716299	T	C	235	0.876964	0.000510868	3.29169	0.460235	DH	Sakha	2021
AX-94626763	7A	701683396	T	G	172	1.21665	9.1e-05	4.04073	0.379076	DH	Sakha	2020
AX-94664145	6A	615432007	C	T	226	1.55401	0.000141595	3.84895	0.191531	DH	Sakha	2021
AX-94699167	5A	586604576	T	C	245	1.09836	0.000769051	3.11404	0.710806	DH	Sakha	2020
AX-94779755	4A	449890286	A	G	102	1.49388	9.83e-06	5.00747	0.0398483	DH	Sakha	2021
AX-94922585	1D	408535167	G	A	0.12	1.67354	0.000916549	3.03784	0.710806	DH	Sakha	2020
AX-95070278	1D	408244851	A	G	118	1.66836	0.00021597	3.66561	0.59946	DH	Sakha	2020
AX-95092538	6A	613761917	G	A	483	2.56897	0.000506572	3.29536	0.460235	DH	Sakha	2021
AX-95105252	4A	534811936	T	C	128	1.31707	3.57e-05	4.44776	0.0722923	DH	Sakha	2021
AX-95186189	2B	40905140	A	G	418	0.852052	3.08e-05	4.51135	0.256532	DH	Sakha	2020
AX-95631320	1A	513661825	C	A	0.46	1.01608	0.000784171	3.10559	0.710806	DH	Sakha	2020
AX-94392034	3B	46329134	T	C	114	0.700284	0.000866226	3.06237	0.82853	DH	Nubaria	2020
AX-94406783	1A	7649303	C	G	357	1.37864	0.000841064	3.07517	0.719388	DH	Nubaria	2021
AX-94510523	2A	14815378	C	G	434	1.57991	0.000301371	3.5209	0.719388	DH	Nubaria	2021
AX-94567789	7A	719577219	C	T	294	0.34738	0.000589197	3.22974	0.82853	DH	Nubaria	2020
AX-94577929	3A	627253803	C	T	429	0.326313	0.00029724	3.52689	0.82853	DH	Nubaria	2020
AX-94643695	2A	14812115	C	T	431	1.58595	4.67e-05	4.33028	0.343021	DH	Nubaria	2021
AX-94725964	1A	517517619	T	G	505	0.328327	0.000282133	3.54955	0.82853	DH	Nubaria	2020
AX-94758693	3B	817351711	C	T	144	0.767708	0.0009682	3.01404	0.82853	DH	Nubaria	2020
AX-94814458	2A	14811929	C	T	417	1.56225	8.47e-05	4.07213	0.343021	DH	Nubaria	2021
AX-94856412	2B	754864363	C	T	278	1.38504	0.000604525	3.21859	0.719388	DH	Nubaria	2021
AX-94873441	4A	28250677	T	C	0.47	0.332568	0.000681127	3.16677	0.82853	DH	Nubaria	2020
AX-94941647	3A	481514811	C	T	189	0.399781	4.04e-05	4.39413	0.338474	DH	Nubaria	2020
AX-95140632	1B	470000710	C	T	138	0.501794	0.00081101	3.09097	0.82853	DH	Nubaria	2020
AX-95257071	1B	604553120	A	G	168	1.16287	0.00092196	3.03529	0.719388	DH	Nubaria	2021
AX-95629148	3A	481018271	G	A	186	0.39518	0.000716053	3.14505	0.82853	DH	Nubaria	2020
AX-94458487	1D	408074249	C	T	112	1.73309	0.000492252	3.30781	0.379579	DH	Gemmiza	2020
AX-95089281	1D	408076346	C	A	444	3.46619	0.000492252	3.30781	0.379579	DH	Gemmiza	2020
AX-95148840	1D	408200751	G	A	112	1.73309	0.000492252	3.30781	0.379579	DH	Gemmiza	2020
AX-94495992	1D	408238937	T	C	112	1.73309	0.000492252	3.30781	0.379579	DH	Gemmiza	2020
AX-94432771	1D	408245576	A	T	112	1.73309	0.000492252	3.30781	0.379579	DH	Gemmiza	2020
AX-94400797	2A	72931279	G	T	175	1.29091	0.000550181	3.25949	0.379579	DH	Gemmiza	2020
AX-94862747	7B	575381160	C	T	448	1.08652	0.000741539	3.12987	0.472246	DH	Gemmiza	2020
AX-94381449	2A	72747207	C	T	188	1.28459	0.000904668	3.04351	0.50791	DH	Gemmiza	2020
AX-95107770	5A	535575251	T	C	376	1.157	0.000920237	3.0361	0.50791	DH	Gemmiza	2020
AX-94406783	1A	7649303	C	G	341	1.65184	0.000505458	3.29631	0.719388	DH	Gemmiza	2020
AX-94448644	1A	485008705	C	T	288	0.961356	0.000584737	3.23304	0.928364	DH	Gemmiza	2021
AX-94779755	4A	449890286	A	G	97	1.62671	0.000560928	3.25109	0.928364	DH	Gemmiza	2021
AX-94867479	1B	686853629	G	A	295	1.13725	0.00033713	3.4722	0.928364	DH	Gemmiza	2021
AX-94894536	1B	638015170	C	T	361	2.16945	0.00027428	3.56181	0.379579	DH	Gemmiza	2020
AX-94922585	1D	408535167	G	A	112	1.73665	0.000286763	3.54248	0.379579	DH	Gemmiza	2020
AX-94965765	1D	409530631	C	G	112	1.75687	0.000335602	3.47418	0.379579	DH	Gemmiza	2020
AX-95070278	1D	408244851	A	G	0.11	1.74952	0.000110791	3.9555	0.379579	DH	Gemmiza	2020
AX-95259089	6A	14608827	C	T	338	0.882495	0.000398202	3.3999	0.928364	DH	Gemmiza	2021
AX-95632832	5D	123499693	C	A	337	1.10113	0.000270121	3.56844	0.379579	DH	Gemmiza	2020
AX-94730854	1D	18611064	G	A	0.28	0.989296	0.000924211	3.03423	0.527948	DM	Sids	2021
AX-94416069	5A	584045136	T	C	219	0.57816	0.000184165	3.73479	0.376709	DM	Sids	2021
AX-94448127	2B	284400055	A	G	189	0.614403	0.000427355	3.36921	0.499517	DM	Sids	2021
AX-94473932	5D	6457629	C	T	495	1.99375	0.000109053	3.96236	0.297423	DM	Sids	2021
AX-94705401	2B	601390342	G	A	126	0.71411	0.000815491	3.08858	0.527948	DM	Sids	2021
AX-94983266	3A	631281628	G	A	323	0.50004	0.000623723	3.20501	0.527948	DM	Sids	2021
AX-94995438	2B	634670426	C	T	485	2.77069	4.76e-06	5.32198	0.0389837	DM	Sids	2021
AX-95091130	5A	582961587	G	T	225	0.592042	0.000242419	3.61543	0.396694	DM	Sids	2021
AX-95181791	5A	584672929	T	G	215	0.585591	7.98e-05	4.09805	0.297423	DM	Sids	2021
AX-95190909	6B	663535960	C	T	112	0.768351	0.000375421	3.42548	0.499517	DM	Sids	2021
AX-94412136	2B	95797298	A	G	151	1.26022	0.000257668	3.58894	0.352679	PH	Sids	2021
AX-94421145	5A	590454088	C	T	272	1.32598	0.000119099	3.92409	0.272418	PH	Sids	2020
AX-94425009	1B	41091716	G	A	387	1.43744	0.000164484	3.78388	0.272418	PH	Sids	2020
AX-94430300	3B	133774958	T	C	126	1.8999	0.000363939	3.43897	0.548148	PH	Sakha	2020
AX-94437143	2B	98256055	C	T	231	1.10856	2.7e-07	6.56913	0.00220015	PH	Sids	2021
AX-94440104	3B	59213475	T	G	208	1.18926	9.07e-06	5.04228	0.0398471	PH	Gemmiza	2021
AX-94452354	5A	481670059	C	G	287	1.49568	0.000368699	3.43333	0.871518	PH	Sakha	2021
AX-94459397	2B	564233562	G	C	222	1.45801	0.000603242	3.21951	0.627673	PH	Sakha	2020
AX-94471363	4B	0	G	C	171	2.49171	0.000151376	3.81994	0.272418	PH	Sids	2020
AX-94472861	5A	535137024	A	G	309	1.39226	0.000647139	3.189	0.871518	PH	Sakha	2021
AX-94492552	3B	37250880	T	C	105	1.42681	3.84e-05	4.41547	0.157723	PH	Nubaria	2021
AX-94502500	6B	0	C	T	346	1.56689	0.000909975	3.04097	0.871518	PH	Sakha	2021
AX-94503907	5A	277334254	T	C	116	2.07375	0.000697363	3.15654	0.871518	PH	Sakha	2021
AX-94507738	7B	556608564	G	A	482	1.29876	0.000426254	3.37033	0.596606	PH	Gemmiza	2020
AX-94511580	6B	191529905	A	T	505	1.86472	0.000366095	3.43641	0.270525	PH	Gemmiza	2021
AX-94564440	2B	0	T	C	156	2.10026	0.000119452	3.92281	0.272418	PH	Sids	2020
AX-94579287	1B	483115039	C	T	258	1.56537	0.000243699	3.61315	0.596606	PH	Gemmiza	2020
AX-94585575	3B	745733286	G	A	263	1.00121	0.000144643	3.8397	0.294999	PH	Sids	2021
AX-94615078	3B	785551749	C	G	138	1.33416	0.000239894	3.61998	0.65659	PH	Nubaria	2021
AX-94633439	2B	97952714	C	G	262	1.03189	3.22e-05	4.49177	0.0876381	PH	Sids	2021
AX-94647143	6A	4269040	G	C	481	1.30929	0.000750981	3.12437	0.761631	PH	Gemmiza	2020
AX-94684904	3B	137325201	T	C	401	1.46397	0.000179129	3.74683	0.548148	PH	Sakha	2020
AX-94684969	3A	0	C	T	459	3.56455	0.000447092	3.3496	0.548148	PH	Sakha	2020
AX-94696576	3B	137603415	G	A	402	1.46585	0.000106577	3.97234	0.548148	PH	Sakha	2020
AX-94701908	6A	0	T	G	287	1.41305	0.000431398	3.36512	0.529397	PH	Sids	2020
AX-94721806	3B	821695756	C	T	336	1.11513	0.000717591	3.14412	0.827666	PH	Nubaria	2021
AX-94730675	1B	666535851	A	G	307	1.43147	0.000626565	3.20303	0.871518	PH	Sakha	2021
AX-94742508	2B	101070979	A	G	193	2.42225	0.000831011	3.08039	0.871518	PH	Sakha	2021
AX-94757158	1B	665310917	T	G	208	1.46606	0.000608048	3.21606	0.529397	PH	Sids	2020
AX-94807485	2B	98360635	T	G	0.32	0.992749	0.00063057	3.20027	0.643023	PH	Sids	2021
AX-94845937	2B	97414473	T	C	121	1.47443	0.000259386	3.58605	0.352679	PH	Sids	2021
AX-94869050	7A	643084044	G	A	284	1.9925	0.000287975	3.54065	0.270525	PH	Gemmiza	2021
AX-94870458	1D	11623274	C	T	295	1.68865	0.000234824	3.62926	0.270525	PH	Gemmiza	2021
AX-94908027	5A	481198102	G	A	149	2.93798	0.000799077	3.09741	0.871518	PH	Sakha	2021
AX-94925165	1B	666352074	C	G	169	1.59346	8.34e-05	4.0787	0.272418	PH	Sids	2020
AX-94926719	5A	451886180	A	G	356	1.28539	0.000975377	3.01083	0.871518	PH	Sakha	2021
AX-94987799	2B	652615024	G	A	143	1.42307	2.84e-05	4.54646	0.157723	PH	Nubaria	2021
AX-94990862	1D	19128274	T	C	485	0.983027	0.000202769	3.693	0.270525	PH	Gemmiza	2021
AX-95002541	5A	588874315	A	C	371	1.26336	0.00046096	3.33634	0.548148	PH	Sakha	2020
AX-95083541	1A	473011768	A	C	99	2.44837	0.000337595	3.4716	0.270525	PH	Gemmiza	2021
AX-95087025	1D	11622965	T	C	259	1.84902	9.76e-06	5.01048	0.0398471	PH	Gemmiza	2021
AX-95125412	7A	0	G	A	287	1.42675	0.000571309	3.24313	0.529397	PH	Sids	2020
AX-95126360	3B	820505764	G	T	268	2.71179	0.000429368	3.36717	0.596606	PH	Gemmiza	2020
AX-95136479	3B	822819414	T	C	151	1.97417	0.000396463	3.4018	0.813839	PH	Nubaria	2021
AX-95152800	1B	16549065	G	A	98	2.45811	0.00059786	3.2234	0.529397	PH	Sids	2020
AX-95155136	6B	122967805	C	T	157	1.74391	0.000395863	3.40245	0.548148	PH	Sakha	2020
AX-95174041	2D	601216600	A	G	137	1.29546	0.000132369	3.87821	0.270165	PH	Gemmiza	2021
AX-95187417	1B	600891040	G	A	254	1.58603	0.000303612	3.51768	0.596606	PH	Gemmiza	2020
AX-95190160	3B	136091845	G	A	0.31	2.91344	0.000210811	3.67611	0.548148	PH	Sakha	2020
AX-95214660	3B	820500970	T	C	475	1.36137	0.000149667	3.82487	0.596606	PH	Gemmiza	2020
AX-95216053	1D	19187345	C	T	0.19	2.88891	0.000838483	3.07651	0.761631	PH	Gemmiza	2020
AX-95230460	5A	592520245	C	G	258	1.59916	0.000505191	3.29654	0.601683	PH	Gemmiza	2020
AX-95239734	7A	521951950	A	C	232	1.15191	0.000880564	3.05524	0.685004	PH	Sids	2021
AX-95241300	2B	99756505	G	A	296	1.05233	0.000553398	3.25696	0.643023	PH	Sids	2021
AX-95244341	6D	464714115	A	G	98	2.15598	0.000930989	3.03106	0.834878	PH	Sakha	2020
AX-95259577	1D	19129440	G	T	0.43	1.39583	0.000333733	3.4766	0.596606	PH	Gemmiza	2020
AX-95652726	2B	92996867	A	G	185	1.20206	3.17e-05	4.49882	0.0876381	PH	Sids	2021
AX-95658958	3B	738590657	A	G	482	1.04836	9.11e-05	4.04054	0.247879	PH	Gemmiza	2021
AX-95206389	3B	68464168	C	T	227	1.18569	0.000389921	3.40902	0.270525	PH	Gemmiza	2021
AX-94500554	4A	661301765	C	T	312	0.985034	0.00043426	3.36225	0.270525	PH	Gemmiza	2021
AX-94929127	1A	473415818	A	G	228	1.19176	0.000520491	3.28359	0.270525	PH	Gemmiza	2021
AX-94503076	1A	474192404	T	C	117	2.36253	0.000521535	3.28272	0.270525	PH	Gemmiza	2021
AX-94694366	1D	11664706	T	C	235	1.81661	0.000534965	3.27167	0.270525	PH	Gemmiza	2021
AX-94849076	2A	166843595	T	C	213	1.19793	0.000545075	3.26354	0.270525	PH	Gemmiza	2021
AX-94637232	3B	68464171	G	T	224	1.18777	0.000562459	3.24991	0.270525	PH	Gemmiza	2021
AX-94580524	7B	7094330	T	G	307	1.72199	0.00057431	3.24085	0.270525	PH	Gemmiza	2021
AX-94532962	3B	68464499	C	T	225	1.18888	0.000613139	3.21244	0.270525	PH	Gemmiza	2021
AX-94894168	7A	125480284	T	C	385	1.05911	0.000629591	3.20094	0.270525	PH	Gemmiza	2021
AX-94568436	3B	0	C	A	223	1.20639	0.0007287	3.13745	0.284651	PH	Gemmiza	2021
AX-94635493	3B	68465455	C	T	223	1.18868	0.000732199	3.13537	0.284651	PH	Gemmiza	2021
AX-94384226	3B	738155424	G	A	487	1.05098	0.000771616	3.1126	0.28634	PH	Gemmiza	2021
AX-94856936	6A	572337460	C	T	0.33	2.59147	0.000822494	3.08487	0.529397	PH	Sids	2020
AX-94521484	3B	822981985	T	C	387	0.983132	0.000872761	3.0591	0.309792	PH	Gemmiza	2021
AX-94648206	2B	99961049	C	T	384	1.04859	0.000906574	3.0426	0.93439	PH	Sids	2021
AX-95258743	6A	73642374	G	C	303	1.32981	0.000907297	3.04225	0.529397	PH	Sids	2020
AX-94722864	1B	10062039	G	A	474	5.41291	0.000907387	3.04221	0.529397	PH	Sids	2020
AX-95629522	3A	649714158	C	A	351	1.05435	0.000923537	3.03455	0.314156	PH	Gemmiza	2021
