# Supplementary material for: Assessment of genetic structure and trait associations of Watkins wheat landraces under Egyptian field conditions
Source: Frontiers journal article supplement (doi:10.3389/fgene.2024.1384220), 2024-12-02
Supplement: Table_2.XLSX [file Table_2.XLSX]

1190453		Afghanistan 49	Asia	Afghanistan
1190456		Afghanistan 44	Asia	Afghanistan
1190458		Afghanistan 29	Asia	Afghanistan
1190460		Afghanistan 82	Asia	Afghanistan
1190463		Afghanistan 5	Asia	Afghanistan
1190465		Afghanistan 45	Asia	Afghanistan
1190468		Afghanistan 46	Asia	Afghanistan
1190470		Afghanistan 55	Asia	Afghanistan
1190471		Afghanistan 108	Asia	Afghanistan
1190473		Afghanistan 105	Asia	Afghanistan
1190474		Afghanistan 109	Asia	Afghanistan
1190475		Afghanistan 110	Asia	Afghanistan
1190478		Afghanistan 84	Asia	Afghanistan
1190530		Afghanistan 60	Asia	Afghanistan
1190667		Afghanistan 32	Asia	Afghanistan
1190223	Shan wheat	Burma 1	Asia	Burma	Ketku- E Jawnghwe State
1190583		China 13	Asia	China	Chongteh (West of Tungting lake)
1190823		Chinese-7 China 2	Asia	China	Hankow
1190587		China 16	Asia	China	Lingsiag- Sinti
1190316		China 16	Asia	China	Linsiang- Sinti
1190141		China 15	Asia	China	Mukden
1190824		Chinese-8 China 4	Asia	China	Shanghai (Tsao-Ka-Doo)
1190827		Chinese-12 China 4	Asia	China	Shanghai (Tsao-Ka-Doo)
1190224	Red wheat	China 8	Asia	China	Tsinan district
1190400		China 29	Asia	China	T'ungch'uan- 150 miles NW of Chungking- Sichuan
1190695		China 29	Asia	China	T'ungch'uan- 150 miles NW of Chungking- Sichuan
1190315		China 1	Asia	China	Wuchang
1190317		China 1	Asia	China	Wuchang
1190321		China 19	Asia	China	Yuan Hsing Shen General Store- Tung An Men Ta-Chieh- Peking. Grown S metropolitan area
1190568		China 19	Asia	China	Yuan Hsing Shen General Store- Tung An Men Ta-Chieh- Peking. Grown S metropolitan area
1190435		China Sh152	Asia	China
1190440		China Sh12	Asia	China
1190444		China Sh172	Asia	China
1190446		China Sh198	Asia	China
1190649		China Sh151	Asia	China
1190650		China Sh231	Asia	China
1190653		China Sh96	Asia	China
1190655		China Sh59	Asia	China
1190657		China Sh222	Asia	China
1190698		China Sh2	Asia	China
1190700	Kaifeng 323-9	China Sh10	Asia	China
1190719		China Sh126	Asia	China
1190721		China Sh166	Asia	China
1190722		China Sh154	Asia	China
1190726		China Sh102	Asia	China
1190727		China Sh21	Asia	China
1190423	Desi	India 300	Asia	India	Achaloa market- Etawah- United Provinces
1190522	Sambhoria (Lalwali Wala)	India 251	Asia	India	Akilganj- Farrukhabad- United Provinces
1190428	Desi	India 312	Asia	India	Auraiya market- Etawah- United Provinces
1190420	Dhania	India 244	Asia	India	Barchhamai- Mainpuri- United Provinces
1190082	Red Tikoria	India 248	Asia	India	Barri- Mainpuri- United Provinces
1190034	Desi	India 267	Asia	India	Etawah market- Etawah- United Provinces
1190424	Desi	India 263	Asia	India	Etawah market- Etawah- United Provinces
1190426	Desi	India 270	Asia	India	Etawah market- Etawah- United Provinces
1190724	Desi	India 265	Asia	India	Etawah market- Etawah- United Provinces
1190241	Lalia	India 181	Asia	India	Gonda- United Provinces
1190409	Setwa	India 182	Asia	India	Gonda- United Provinces
1190125	Federation	India 172	Asia	India	Gorakhpur Govt. Agril. Farm- United Provinces
1190520		India 156	Asia	India	Hardoi market- United Provinces
1190406	Desi	India 144	Asia	India	Hasanganj- Unnao- United Provinces
1190646	Desi	India 281	Asia	India	Jaswantnagar market- Etawah- United Provinces
1190242	White Murga	India 246	Asia	India	Jhapora- Mainpuri- United Provinces
1190412	Desi White	India 239	Asia	India	Khaga- Fatehpore- United Provinces
1190167	Thori	India 223	Asia	India	Khudadad- Nasirabad- Baluchistan
1190429	Soor Ghanum	India 328	Asia	India	Kibzai- Lower Zhob- Baluchistan
1190127	Thori (beardless)	India 212	Asia	India	Kurk- Sibi- Baluchistan
1190199	Boojri (bearded)	India 213	Asia	India	Margnzani- Sibi- Baluchistan
1190697	Desi	India 191	Asia	India	Matera Kalan- United Provinces
1190414		India 117	Asia	India	Mekhtar- Bori- Loralai
1190433	Soor Ghanum	India 344	Asia	India	Musafirpur- Upper Zhob- Baluchistan
1190707	Walaiti (Mastung wheat)	India 324	Asia	India	Panjpai- Shorarud- Baluchistan
1190233	Lyallpur 14	India 47	Asia	India	Punjab
1190381	Lyallpur 14	India 47	Asia	India	Punjab
1190512	Lyallpur 11	India 44	Asia	India	Punjab
1190694	Lyallpur 8A	India 39	Asia	India	Punjab
1190012	Pusa 90	India 6	Asia	India	Pusa- Bihar
1190803	Pusa 80-5	India 5	Asia	India	Pusa- Bihar
1190232	Pusa 52	India 4	Asia	India	Pusa-Bihar
1190246	Soor Ghanum	India 332	Asia	India	Sadar Killa Saifulla- Upper Zhob- Baluchistan
1190430	Soor Ghanum	India 335	Asia	India	Sadar Killa Saifulla- Upper Zhob- Baluchistan
1190166	Meerutti Desi	India 165	Asia	India	Saharanpur- United Provinces
1190644	Kaghzi Desi	India 168	Asia	India	Saharanpur- United Provinces
1190129		India 86	Asia	India	Sakrand- Sind
1190382		India 80	Asia	India	Sakrand- Sind
1190032	Dehak	India 321	Asia	India	Sandhori- Nushki- Baluchistan
1190124		India 227	Asia	India	Sharigh- Baluchistan
1190407		India 227	Asia	India	Sharigh- Baluchistan
1190094	Pashmak	India 322	Asia	India	Shishari- Nushki- Baluchistan
1190081	Gahu (Nepali) or Kyo (Sikkimese)	India 115	Asia	India	Sikkim
1190711	Gahu (Nepali) or Kyo (Sikkimese)	India 115	Asia	India	Sikkim
1190731	Gahu (Nepali) or Kyo (Sikkimese)	India 116	Asia	India	Sikkim
1190732	Gahu (Nepali) or Kyo (Sikkimese)	India 116	Asia	India	Sikkim
1190517	Spin	India 123	Asia	India	Smallan- Sinjawi- Loralai
1190413		India 101	Asia	India	Srinagor- Kashmir
1190419		India 105	Asia	India	Srinagor- Kashmir
1190206	Desi White	India 235	Asia	India	Supasangaon- Fatehpore- United Provinces
1190126	Dolatkhani (white)	India 206	Asia	India	United Provinces
1190903	Mundia	India 202	Asia	India	United Provinces
1190248	Desi	India 287	Asia	India	Vharhtna market- Etawah- United Provinces
1190633		India (87??)	Asia	India
1190789	Abi	Turkestan 3	Asia	Turkestan	Kunduz- Turkestan
1190788		Turkestan W84528	Asia	Turkestan	Turkestan
1190007		Australia 14	Australia	Australia
1190023	College Purple	Australia CCI W105	Australia	Australia
1190024	Aussie	Australia CCI W13	Australia	Australia
1190030	Majestic	Australia CCI W359	Australia	Australia
1190136	Exquisite	Australia CCI W267	Australia	Australia
1190138	Duchess	Australia CCI W316	Australia	Australia
1190507		Australia 10	Australia	Australia
1190260		Canary 2	Europe (West)	Canary Islands	Grand Canary
1190262		Canary 2	Europe (West)	Canary Islands	Grand Canary
1190264		Canary 4	Europe (West)	Canary Islands	Teneriffe
1190552		Canary 4	Europe (West)	Canary Islands	Teneriffe
1190557		Canary 4	Europe (West)	Canary Islands	Teneriffe
1190346		Varna 14	Europe (East)	Bulgaria	Konstandenez
1190623		Varna 14	Europe (East)	Bulgaria	Konstandenez
1190622	Shumen	Varna 29	Europe (East)	Bulgaria	Torlak- Razgrad
1190347		Varna 30	Europe (East)	Bulgaria	Tsvetkovitzi (Gabravo)
1190349	Golema Franga	Varna 25	Europe (East)	Bulgaria	Varna- Voditza
1190290		Crete 13	Europe (West)	Crete	Kaina- Apokoronna- Canea
1190046		Crete 6	Europe (West)	Crete	Lakkous- Cydonia- Canea
1190222	Leventis (Blé de Pologne)	Crete 5	Europe (West)	Crete	Plain of Messara- Candia district
1190563	Blé zombitos	Crete 2	Europe (West)	Crete	Plain of Messara- Candia district
1190561		Crete 15	Europe (West)	Crete	Vafe- Apokoronna- Canea
1190639		Crete 7	Europe (West)	Crete	Yerolakko- Canea
1190292	Asprokoutsoullon	Cyprus 15	Europe (West)	Cyprus	Paphos district.
1190291	Psathas	Cyprus 3	Europe (West)	Cyprus	Whole Island
1190777		Finland 3	Europe (East)	Finland
1190042	Inversal	France 26	Europe (West)	France
1190106	Magnitot	France 4	Europe (West)	France
1190139	Bladette de Besplas	France 10	Europe (West)	France
1190189	Rouge de St-Laud	France 9	Europe (West)	France
1190605	Karabash	Salonika 1	Europe (West)	Greece	American farm school.
1190560	Asprotheri	Greece 24	Europe (West)	Greece	Corfu Island
1190286		Greece 2	Europe (West)	Greece	Cyclades (received from Syra)
1190690		Greece 21	Europe (West)	Greece	Kalvarita district- Peloponese
1190565		Greece 15	Europe (West)	Greece	Patras district- Peloponese
1190566		Greece 18	Europe (West)	Greece	Pygros district- Peloponese
1190562		Greece 19	Europe (West)	Greece	Tripolis district- Peloponese
1190231		Hungary 6	Europe (East)	Hungary
1190680	Grano locale	Italy 29	Europe (West)	Italy	Aquila
1190816		Italy W8457	Europe (West)	Italy	Piacenza
1190737	Edda	Italy W106819	Europe (West)	Italy	Royal Exp. Sta. Rieti
1190784	Oberdan	Italy W106825	Europe (West)	Italy	Royal Exp. Sta. Rieti
1190103	Gentil Rossa, Flaksberger 19928	Italy 20	Europe (West)	Italy
1190104	Tipo Coronation R.95, Flaksberger 26539	Italy 21	Europe (West)	Italy
1190186	Flaksberger 21231	Italy 14	Europe (West)	Italy
1190187	Flaksberger 21222	Italy 15	Europe (West)	Italy
1190484	Decimomanna, Flaksberger 20119	Sardinia 4	Europe (West)	Italy
1190806		Italy W4808	Europe (West)	Italy
1190088	Trigo preto rijo	Portugal 44	Europe (East)	Poland	Castro Verde
1190181	Kujawianka Wieclawicka	Poland 1	Europe (East)	Poland
1190483	Surka Oscista	Poland 21	Europe (East)	Poland
1190670	Zlotka Miczynskiego	Poland 9	Europe (East)	Poland
1190401	Trigo Marquês	Portugal 54	Europe (West)	Portugal	Alter do Châo
1190153	Trigo luanco rijo	Portugal 19	Europe (West)	Portugal	Castro Verde
1190509		Portugal 8	Europe (West)	Portugal	Elvas
1190397	Trigo Ribeiro	Portugal 41	Europe (West)	Portugal	Extremoz
1190339	Trigo Precoce	Portugal 115	Europe (West)	Portugal	Ferreira do Alemtejo
1190155	Trigo Marques on Pero Espuna	Portugal 105	Europe (West)	Portugal	Frontiera
1190591	Trigo Anafil	Portugal 61	Europe (West)	Portugal	Frontiera
1190396	Trigo Rietti	Portugal 77	Europe (West)	Portugal	Golegã
1190229	Trigo Tremês	Portugal 106	Europe (West)	Portugal	Loulé
1190594	Trigo Durasio branco	Portugal 35	Europe (West)	Portugal	Mafra
1190590	Trigo luanca Bonito	Portugal 18	Europe (West)	Portugal	Mertola
1190598	Trigo Ideal	Portugal 34	Europe (West)	Portugal	Mertola
1190008	Trigo Temporao de Coruche	Portugal 94	Europe (West)	Portugal	Monforte
1190151	Trigo môcho ruivo	Portugal 47	Europe (West)	Portugal	Ourique
1190394	Trigo Mourisco ruivo	Portugal 63	Europe (West)	Portugal	Ourique
1190596	Trigo Galego Môcho	Portugal 110	Europe (West)	Portugal	Portalegre
1190448	Tiganesti 653	Rumania 4	Europe (East)	Romania
1190449	Todiresti	Rumania 10	Europe (East)	Romania
1190662	Samanta 1252	Rumania 3	Europe (East)	Romania
1190130	Marquis	Salamanca 3	Europe (West)	Spain	Arcediano- Salamanca
1190403	Marquis	Salamanca 3	Europe (West)	Spain	Arcediano- Salamanca
1190685	Trigo duros	Seville 20	Europe (West)	Spain	Campiñas- Seville
1190239	Barbilla	Salamanca 6	Europe (West)	Spain	Gallegos- Salamanca
1190387		Mahon 5	Europe (West)	Spain	Minorca- southern part of Mahon
1190063	Manitoba	Navarre 71	Europe (West)	Spain	Navarre
1190067	Toseta de Oronz	Navarre 67	Europe (West)	Spain	Navarre
1190160	Mocho de Burgos	Navarre 64	Europe (West)	Spain	Navarre
1190268	Catalan de tallo corto	Navarre 6	Europe (West)	Spain	Navarre
1190271	Hembrilla alto, feurta	Navarre 26	Europe (West)	Spain	Navarre
1190492	Aduna	Navarre 43	Europe (West)	Spain	Navarre
1190541	Colorado temporano	Navarre 8	Europe (West)	Spain	Navarre
1190543	Marzal	Navarre 18	Europe (West)	Spain	Navarre
1190546	Hembrilla alto, fuerta	Navarre 26	Europe (West)	Spain	Navarre
1190547	Royo de alta	Navarre 28	Europe (West)	Spain	Navarre
1190549	Catalan de grana corto	Navarre 7	Europe (West)	Spain	Navarre
1190551	Hembrilla Rieti	Navarre 22	Europe (West)	Spain	Navarre
1190683	Catalan de grano corto pesado	Navarre 17	Europe (West)	Spain	Navarre
1190083	Rigoctia	Vizcaya 19	Europe (West)	Spain	Rigotia- Biscay
1190228	Trigo Candeal Blanquillo	Valladolid 1	Europe (West)	Spain	Tierra de Canpos
1190604		Navarre 74	Europe (West)	Spain	Uterga- 18km from Pamplona- Navarre
1190053		Alicante 2	Europe (West)	Spain	Valdepeñas district in heart of "La Mancha" wine district
1190219		Alicante 1	Europe (West)	Spain	Vallodolid district
1190273		Seville 17	Europe (West)	Spain	Valverde del Camino- Huelva
1190277		Seville 17	Europe (West)	Spain	Valverde del Camino- Huelva
1190117	Trigo môcho (sin raspa)	Valencia 10	Europe (West)	Spain	Villar del Arzobispo
1190066	Mocho	Leon 1	Europe (West)	Spain
1190149	Squarehead's Master		Europe (West)	United Kingdom
1190352		Sarajevo 8	Europe (East)	Yugoslavia	Bugojno- Travnik- Bosnia
1190355		Dalmatia 5	Europe (East)	Yugoslavia	Bukovica- Dalmatia
1190356		Dalmatia 5	Europe (East)	Yugoslavia	Bukovica- Dalmatia
1190351		Sarajevo 14	Europe (East)	Yugoslavia	Cajetina- c.30km SW of Uzice- Bosnia
1190361		Belgrade 11	Europe (East)	Yugoslavia	Donja Banica
1190668		Belgrade 9	Europe (East)	Yugoslavia	Marena
1190115		Dalmatia 4	Europe (East)	Yugoslavia	Napolica- Dalmatia
1190614	Potiska	Belgrade 1	Europe (East)	Yugoslavia	Novi Sad
1190611		Sarajevo 2	Europe (East)	Yugoslavia	Rogatica- Sarajevo- Bosnia
1190015		Sarajevo 13	Europe (East)	Yugoslavia	Uzice- Bosnia
1190619		Sarajevo 16	Europe (East)	Yugoslavia	Velika Kladusa- Bosnia
1190360	Veliko Hoce	Belgrade 10	Europe (East)	Yugoslavia	Veliko Hoce
1190363	Veliko Hoce	Belgrade 10	Europe (East)	Yugoslavia	Veliko Hoce
1190607	Veliko Hoce	Belgrade 10	Europe (East)	Yugoslavia	Veliko Hoce
1190370	Native winter	Croatia 6	Europe (East)	Yugoslavia	Vidovec- Varazdin- Croatia
1190704	Ma'auneh	Persia 28	Middle East	Iran	53 miles SE of Yazd- Mehdiabad
1190627		Persia 45	Middle East	Iran	Asadabad- SW Hamadan
1190237		Persia 69	Middle East	Iran	Burujird
1190513		Persia 39	Middle East	Iran	Hajjilu- N Hamadan
1190625		Persia 39	Middle East	Iran	Hajjilu- N Hamadan
1190579	Vassfe	Persia 13	Middle East	Iran	Hamadan
1190629	Qizilqin Boghda	Persia 79	Middle East	Iran	Hashdarud- Azerbaijan province
1190678		Persia 24	Middle East	Iran	Hashtjerd- nr Kazvin
1190729	Gandum-i-Jiruft	Persia 114	Middle East	Iran	Jiruft & Roodbar- Kerman
1190405	Safid	Persia 123	Middle East	Iran	Kermanshah
1190515	Zardak-i-Harrami	Persia 125	Middle East	Iran	Kermanshah
1190505		Persia 18	Middle East	Iran	Kharaghan- 90 miles S of Tehran
1190238		Persia 44	Middle East	Iran	Mehraban- N Hamadan
1190578		Persia 15	Middle East	Iran	Nasseri- Khusistan
1190308		Persia 8	Middle East	Iran	Rasht- Caspian shore
1190576		Persia 8	Middle East	Iran	Rasht- Caspian shore
1190580		Persia 8	Middle East	Iran	Rasht- Caspian shore
1190681		Persia 8	Middle East	Iran	Rasht- Caspian shore
1190376	Vilayati	Persia 65	Middle East	Iran	Sari- Mazanderan
1190379	Kal	Persia 50	Middle East	Iran	Sar-i-Jam- 40 miles SSE of Meshed- Khorasan
1190705	Kooseh	Persia 17	Middle East	Iran	Sauj Bolak- W of Tehran
1190240	Razan Ferahan	Persia 96	Middle East	Iran	Tehran district
1190404	Serabend	Persia 99	Middle East	Iran	Tehran district
1190004	Rustam Exp Farm 99	Iraq 34	Middle East	Iraq	Baqubah
1190728	Rustam Exp Farm 171	Iraq 37	Middle East	Iraq	Tigris region
1190398	Abu Fashi	Palestine 3	Middle East	Palestine
1190302	Bayadié	Aleppo 32	Middle East	Syria	Banks of Euphrates
1190572		Damascus 12	Middle East	Syria	Hama
1190045	Douchani	Beyrout 3	Middle East	Syria	Lebanon- Bekaa- Baalbek- Damascus
1190300		Smyrna 17	Middle East	Turkey	Kirk Agach- 50 miles NE of Izmir
1190637		Smyrna 17	Middle East	Turkey	Kirk Agach- 50 miles NE of Izmir
1190571		Smyrna 13	Middle East	Turkey	Oushak- 120 miles E of Izmir
1190293		Smyrna 6	Middle East	Turkey	Seraikeuy
1190298		Smyrna 6	Middle East	Turkey	Seraikeuy
1190299		Smyrna 6	Middle East	Turkey	Seraikeuy
1190301		Smyrna 6	Middle East	Turkey	Seraikeuy
1190573		Smyrna 3	Middle East	Turkey	Tireh
1190574		Smyrna 8	Middle East	Turkey
1190769	Mahon	Algeria 18	North Africa	Algeria	Hindi- Mahon
1190485	Flaksberger 16200	Algeria 9	North Africa	Algeria
1190742		Algeria 35	North Africa	Algeria
1190209	Belardi 24B	Egypt 4	North Africa	Egypt
1190305		Sinai 1	North Africa	Egypt
1190747		Abyssinia AV12.4	North Africa	Ethiopia
1190774		Abyssinia AV15.1	North Africa	Ethiopia
1190213	Mahan	Morocco 16	North Africa	Morocco	Bouskoura- Casablanca
1190044		Morocco 55	North Africa	Morocco	Granja Agricola- Quebdana- Melilla
1190534		Morocco 55	North Africa	Morocco	Granja Agricola- Quebdana- Melilla
1190496		Morocco 30	North Africa	Morocco	Mazagan district
1190254		Morocco 9	North Africa	Morocco	Tazi- Kenitra
1190216		Morocco 11	North Africa	Morocco	Zenatas- Shaouia
1190493	Sbei 292	Tunis 8	North Africa	Tunisia	Béja (El-Houffia)
1190676	Souri	Tunis 23	North Africa	Tunisia	Le Dyr du Kef
1190811		Algeria W7558	North Africa	Tunisia	Maison Carree
1190538	Biskri	Tunis 11	North Africa	Tunisia	Souk-el-Arba
1190218	Sbei Noir	Tunis 4	North Africa	Tunisia	Soul-el-Khemis
1190814	Allorca	Algeria W4578	North Africa	Tunisia	Tunis
1190486	erythrospermum Korn., Flaksberger 17517	Armenia 3	USSR	USSR	Armenia
1190487	erythrospermum Korn., Flaksberger 23613	Armenia 4	USSR	USSR	Armenia
1190671	ferrugineum Al., Flaksberger 17525	Armenia 9	USSR	USSR	Armenia
1190673	ferrugineum Al., Flaksberger 17525	Armenia 8	USSR	USSR	Armenia
1190746	Muganka	Azerbaijan W73337	USSR	USSR	Azerbaijan
1190752		Caucasus W2397	USSR	USSR	Caucasus
1190760		Armenia W94379	USSR	USSR	Erivan- Armenia
1190773		Georgia W57143	USSR	USSR	Georgia
1190775		Georgia W57164	USSR	USSR	Georgia
1190802		Georgia W57180	USSR	USSR	Georgia
1190804	Dickson J G 302	Georgia W94675	USSR	USSR	Georgia
1190759		Armenia W94343	USSR	USSR	Gonzah- Armenia
1190770		Irkutsk W43322	USSR	USSR	Irkutsk
1190771		Irkutsk W43325	USSR	USSR	Irkutsk
1190749		Siberia W4134	USSR	USSR	Siberia
1190750	Valki Exp Sta 3	Ukraine W94452	USSR	USSR	Ukraine
1190743		Yenisei W43319	USSR	USSR	Yenisei
1190794		USSR W61101	USSR	USSR
1190114			Europe (East)	Yugoslavia
1190145	Aurora		Europe (West)	Spain
1190164	Bhawarwall		Asia	India
1190297			Middle East	Turkey
1190304			Middle East	Syria
1190399			Asia	China
1190528			Asia	China
1190079	Dolatkhani (white)		Asia	India
1190648			Asia	China
BAJ
BecardKachu
Chinese_Spring
CIMCOG_26
CIMCOG_3
CIMCOG_32
CIMCOG_47
CIMCOG_49
CIMCOG_53
CIMCOG_56
MISR1
Paragon
Pfau
Super152
Weebill
Wyalkatchem
